# Supplementary material for: The mitochondrial genome structure of Xenoturbella bocki (phylum Xenoturbellida) is ancestral within the deuterostomes
Source: PubMed Central journal article supplement (PMC2697986; doi:10.1186/1471-2148-9-107), 2009-05-18

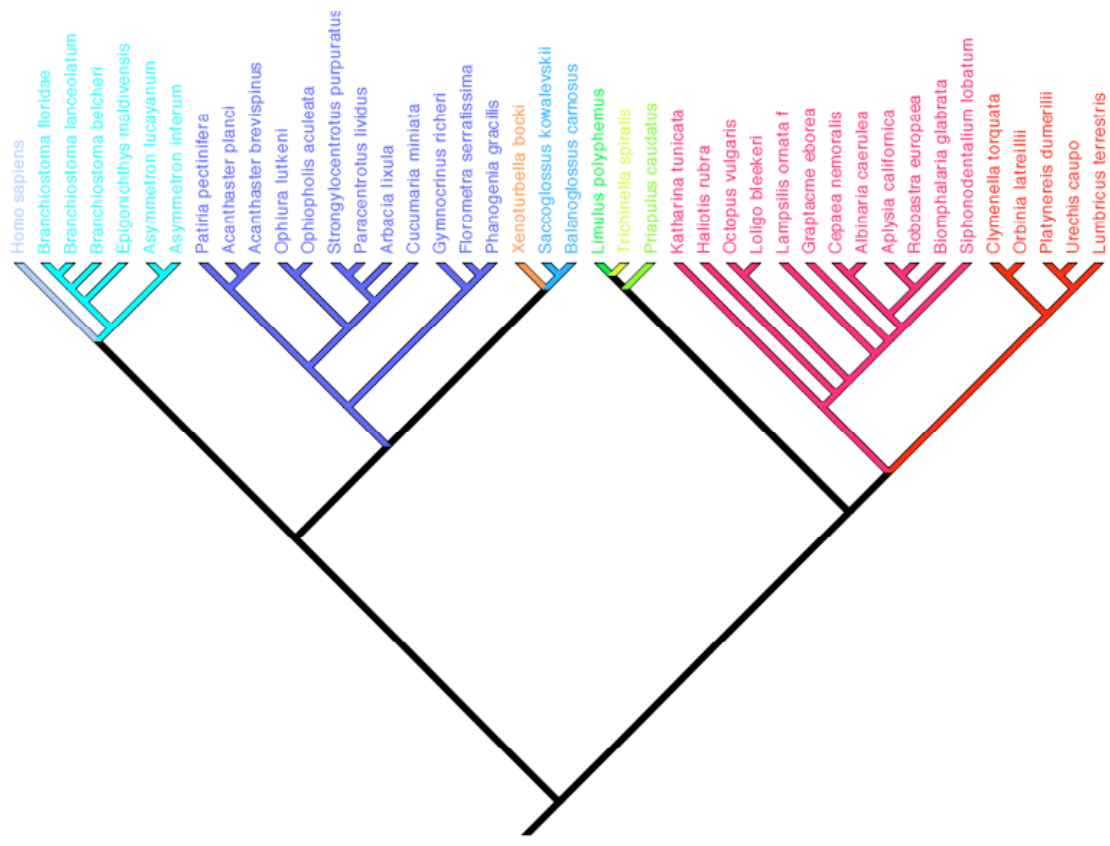

Supplement: 1471-2148-9-107-S4.pdf [file 1471-2148-9-107-S4.pdf]
